# Supplementary material for: Arabidopsis ENHANCED DISEASE SUSCEPTIBILITY1 promotes systemic acquired resistance via azelaic acid and its precursor 9-oxo nonanoic acid
Source: J Exp Bot. 2014 Aug 11;65(20):5919–31. doi: 10.1093/jxb/eru331 (PMC4203127; doi:10.1093/jxb/eru331)
Supplement: Supplementary Data [file supp_eru331_jexbot127514_file001.pdf]

| ID | theoretical mass [M-H] <sup>-</sup> | experimental mass [M-H] <sup>-</sup> | Error (ppm) | Annotated as                                                          | chemical formula |
|----|-------------------------------------|--------------------------------------|-------------|-----------------------------------------------------------------------|------------------|
| 1  | 215.16527                           | 215.1652916                          | -0.10       | 12-Hydroxydodecanoic acid                                             | C12H24O3         |
| 2  | 221.081935                          | 221.0819606                          | -0.12       | Monoisobutyl phthalic acid                                            | C12H14O4         |
| 3  | 243.066285                          | 243.0663066                          | -0.09       | 3,3',4',5'-Tetrahydroxystilbene                                       | C14H12O4         |
| 4  | 253.050635                          | 253.0506626                          | -0.11       | Hispidol                                                              | C15H10O4         |
| 5  | 255.066285                          | 255.0663186                          | -0.13       | Isoliquiritigenin                                                     | C15H12O4         |
| 6  | 257.04555                           | 257.0455956                          | -0.18       | Gentisin                                                              | C14H10O5         |
| 7  | 269.04555                           | 269.0455786                          | -0.11       | Sulphuretin                                                           | C15H10O5         |
| 8  | 271.0612                            | 271.0612396                          | -0.15       | Naringenin chalcone                                                   | C15H12O5         |
| 9  | 273.07685                           | 273.0768976                          | -0.18       | Phloretin                                                             | C15H14O5         |
| 10 | 281.11832                           | 281.1183736                          | -0.19       | Randainol                                                             | C18H18O3         |
| 11 | 285.07685                           | 285.0769156                          | -0.23       | Oxypeucedanin                                                         | C16H14O5         |
| 12 | 287.056115                          | 287.0561416                          | -0.09       | Micromelin                                                            | C15H12O6         |
| 13 | 295.13397                           | 295.1340366                          | -0.23       | 4-Prenylresveratrol                                                   | C19H20O3         |
| 14 | 301.071765                          | 301.0718036                          | -0.13       | Homoeriodictyol chalcone                                              | C16H14O6         |
| 15 | 303.05103                           | 303.0510896                          | -0.20       | Pentahydroxyflavanone                                                 | C15H12O7         |
| 16 | 311.098375                          | 311.0983406                          | 0.11        | Galactose-beta-1,4-xylose                                             | C11H20O10        |
| 17 | 315.087415                          | 315.0874016                          | 0.04        | Cajanol                                                               | C17H16O6         |
| 18 | 327.07216                           | 327.0722216                          | -0.19       | Bergenin                                                              | C14H16O9         |
| 19 | 403.285385                          | 403.2854946                          | -0.27       | MG(0:0/22:5(4Z,7Z,10Z,13Z,16Z)/0:0)                                   | C25H40O4         |
| 20 | 405.11911                           | 405.1192266                          | -0.29       | Astringin                                                             | C20H22O9         |
| 21 | 415.10346                           | 415.1035976                          | -0.33       | Daidzin                                                               | C21H20O9         |
| 22 | 417.11911                           | 417.1192536                          | -0.35       | Barbaloin                                                             | C21H22O9         |
| 23 | 417.155495                          | 417.1556186                          | -0.30       | (+)-Syringaresinol                                                    | C22H26O8         |
| 24 | 421.114025                          | 421.1141846                          | -0.38       | Plcatic acid                                                          | C20H22O10        |
| 25 | 429.301035                          | 429.3011466                          | -0.26       | Convallamarogenin                                                     | C27H42O4         |
| 26 | 431.098375                          | 431.0984716                          | -0.23       | Vitexin                                                               | C21H20O10        |
| 27 | 431.13476                           | 431.1348676                          | -0.25       | 2-(2,4,5-Trimethoxyphenyl)-5,6,7,8-tetramethoxy-4H-1-benzopyran-4-one | C22H24O9         |
| 28 | 433.114025                          | 433.1141636                          | -0.32       | Phlorizin chalcone                                                    | C21H22O10        |
| 29 | 435.09329                           | 435.0933886                          | -0.23       | Irisxanthone                                                          | C20H20O11        |
| 30 | 435.129675                          | 435.1298096                          | -0.31       | Phlorizin                                                             | C21H24O10        |
| 31 | 439.358155                          | 439.3583166                          | -0.37       | 21beta-Hydroxyserrat-14-en-3-one                                      | C30H48O2         |
| 32 | 445.114025                          | 445.1141406                          | -0.26       | Biochanin A-beta-D-glucoside                                          | C22H22O10        |
| 33 | 445.332335                          | 445.3324916                          | -0.35       | 3-Dehydroatesterone                                                   | C28H46O4         |
| 34 | 447.09329                           | 447.0934396                          | -0.34       | Carthamone                                                            | C21H20O11        |
| 35 | 447.129675                          | 447.1296576                          | 0.04        | Neosakuranin                                                          | C22H24O10        |
| 36 | 449.10894                           | 449.1090616                          | -0.27       | 2',3,4,4',6'-Peptahydroxychalcone 4'-O-glucoside                      | C21H22O11        |
| 37 | 457.36872                           | 457.3688716                          | -0.33       | Soyasapogenol B                                                       | C30H50O3         |
| 38 | 461.10894                           | 461.1090806                          | -0.31       | Isoscoparine                                                          | C22H22O11        |
| 39 | 463.12459                           | 463.1247026                          | -0.24       | Hesperetin 7-O-glucoside                                              | C22H24O11        |
| 40 | 465.103855                          | 465.1037886                          | 0.14        | Taxifolin 7-O-beta-D-glucopyranoside                                  | C21H22O12        |
| 41 | 471.347985                          | 471.3481476                          | -0.35       | Gratiogenin                                                           | C30H48O4         |
| 42 | 473.363635                          | 473.3637906                          | -0.33       | Sapelin A                                                             | C30H50O4         |
| 43 | 477.103855                          | 477.1039886                          | -0.28       | Isorhamnetin 3-O-beta-D-glucopyranoside                               | C22H22O12        |
| 44 | 487.3429                            | 487.3431176                          | -0.45       | Asiatic acid                                                          | C30H48O5         |
| 45 | 489.35855                           | 489.3587516                          | -0.41       | Barringtonenol C                                                      | C30H50O5         |
| 46 | 491.119505                          | 491.1196586                          | -0.31       | Aurantio-obtusin beta-D-glucoside                                     | C23H24O12        |
| 47 | 505.135155                          | 505.1353836                          | -0.45       | Junipegenin B 7-O-glucoside                                           | C24H26O12        |
| 48 | 519.150805                          | 519.1508646                          | -0.12       | Chryso-obtusin glucoside                                              | C25H28O12        |
| 49 | 519.18719                           | 519.1873696                          | -0.35       | Brusatol                                                              | C26H32O11        |
| 50 | 521.13007                           | 521.1302706                          | -0.39       | Iridin                                                                | C24H26O13        |
| 51 | 521.20284                           | 521.2028166                          | 0.04        | Isobrucein A                                                          | C26H34O11        |
| 52 | 549.197755                          | 549.1975366                          | 0.40        | Eucommin A                                                            | C27H34O12        |
| 53 | 561.37968                           | 561.3799596                          | -0.50       | Cholesterol glucuronide                                               | C33H54O7         |
| 54 | 563.140635                          | 563.1410386                          | -0.72       | Apigenin 7-O-[beta-D-apiosyl-(1->2)-beta-D-glucoside]                 | C26H28O14        |
| 55 | 577.374595                          | 577.3749046                          | -0.54       | Asparagoside A                                                        | C33H54O8         |
| 56 | 609.146115                          | 609.1464736                          | -0.59       | Lucenin-2                                                             | C27H30O16        |

**Supplemental Table S1** Annotated metabolites identified by FT-ICR-MS in SARiac1-3. The signal-to-noise (S/N) ratio of each mass in the HPLC fractions of extracts from *AvrRpm1-HA*-expressing wt plants was at least five-fold higher compared to their S/N ratio in the corresponding HPLC fractions of extracts from the *eds1-2* mutant. This experiment was repeated two times with similar results.

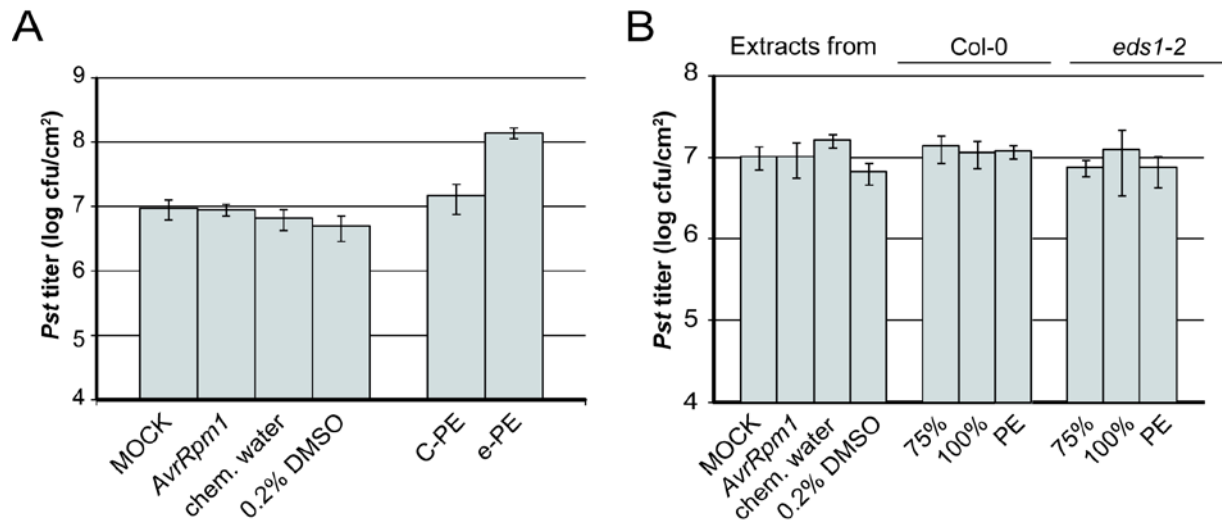

**Supplemental Figure S1** SAR bio assays in *eds1-2* mutant plants (A/B) *eds1-2* mutant plants were locally treated with 10 mM MgCl<sub>2</sub> (MOCK), *Pst/AvrRpm1* (*AvrRpm1*), chemical-treated water (chem. water), 0.2% DMSO, or with different fractions from plants extracts. (A) Plant were treated with the PE-phases from DEX-treated *pDEX:AvrRpm1-HA* Col-0 (C-PE) and *pDEX:AvrRpm1-HA eds1-2* (e-PE) plants. (B) Plants were treated with the SPE eluates indicated below the panel (75% and 100% refer to MeOH) from DEX-treated *pDEX:AvrRpm1-HA* Col-0 and *pDEX:AvrRpm1-HA eds1-2* mutant plants as indicated above the panel. (A/B) Three days later, systemic leaves were infected with *Pst* and the resulting *Pst* titers are shown at four dpi. This experiment was repeated two times with similar results.

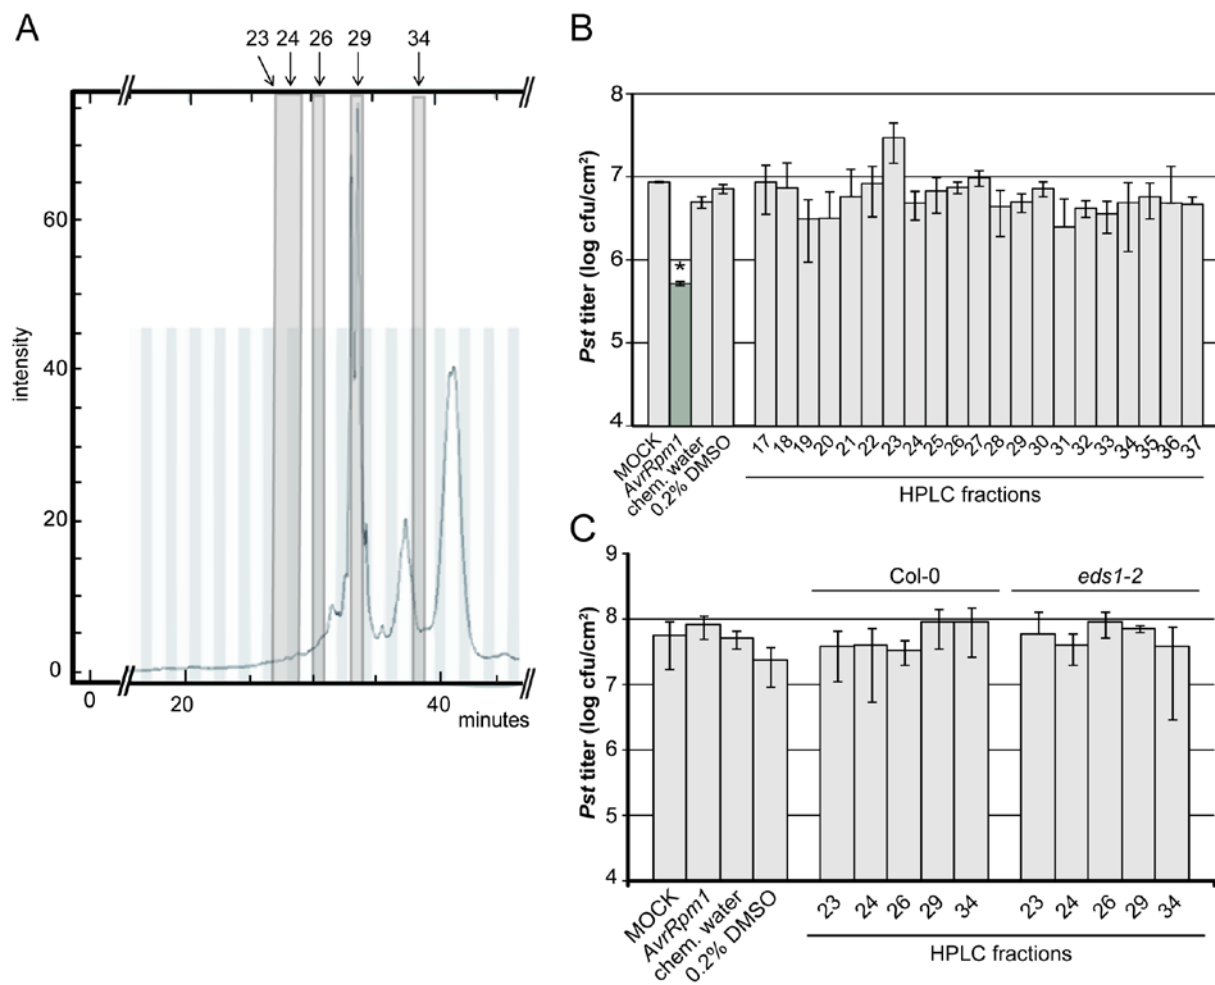

**Supplemental Figure S2** HPLC-assisted separation of SAR-inducing metabolites and their dependency on *EDS1*. (A) UV absorption signal of a MeOH gradient HPLC chromatogram derived from DEX-treated *pDEX:AvrRpm1-HA eds1-2* plants. The signal intensity at 260 nm (y-axis) is shown against the HPLC retention time in minutes (x-axis). Fractions 17 to 37 are highlighted as alternating grey and white bars. The fractions that correspond to SAR-inducing fractions derived from wt plants are further highlighted in light grey and numbered above the panel. (B) SAR bio assay in Col-0 wt plants using the HPLC fractions from the *eds1-2* mutant for the primary treatment. Col-0 plants were locally treated with 10 mM  $MgCl_2$  (MOCK), *Pst/AvrRpm1* (*AvrRpm1*), chemical-treated water (chem. water), or 0.2% DMSO as controls or with HPLC fractions 17 to 37 derived from DEX-treated *pDEX:AvrRpm1-HA eds1-2* mutant plants. (C) SAR bio assay in *eds1-2* mutant plants. *eds1-2* mutant plants were locally treated with the same controls as in (B) or with the SAR-inducing HPLC fractions (as indicated below the panel) from DEX-treated *pDEX:AvrRpm1-HA* Col-0 wt plants (as indicated above the panel) or the corresponding HPLC fractions from the *eds1-2* mutant. (B/C) Three days after the primary treatment, systemic leaves were infected with *Pst* and the resulting *Pst* titers are shown four days after infection (dpi). Asterisk above bar indicates a statistically significant difference to the MOCK control (\*  $P < 0.05$ , Student's *t* test). These experiments were repeated two (B/C) to three (A) times with similar results.

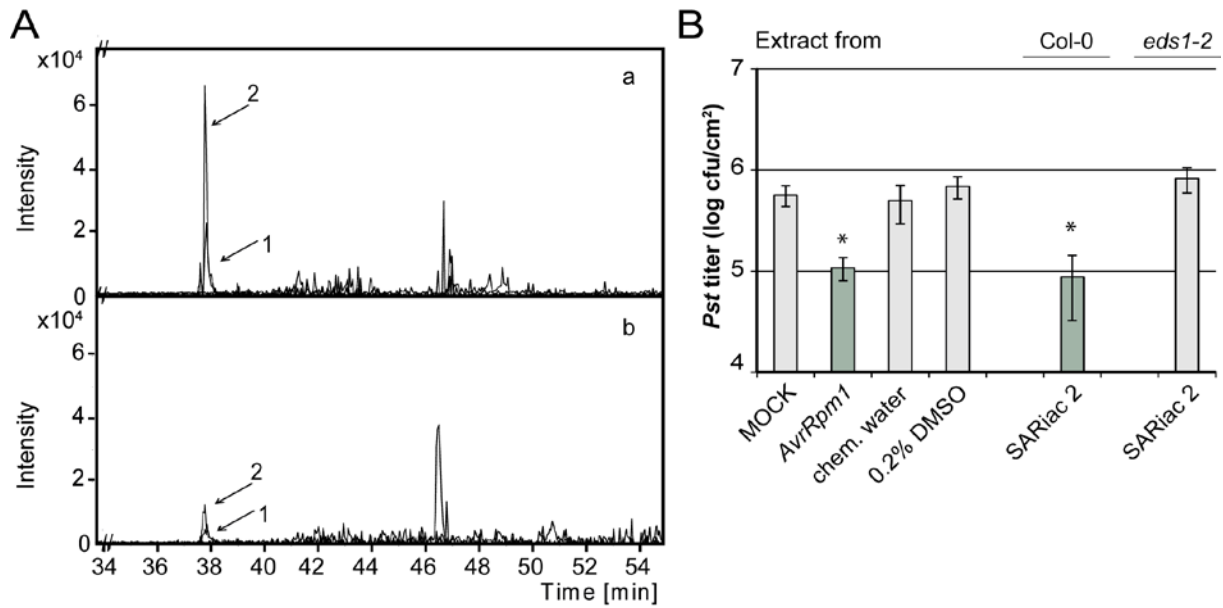

**Supplemental Figure S3** The SAR-inducing activity of SARiac2 is associated with the accumulation of ONA and AzA. (A) LC-MS analysis of SARiac 2 from DEX-treated *pDEX:AvrRpm1-HA* Col-0 plants and the corresponding HPLC fraction from DEX-treated *pDEX:AvrRpm1-HA eds1-2* mutant plants. Intensity peaks (y-axis) detected in the negative ionization mode are plotted against the LC retention time in minutes (x-axis). Upper panel (a) corresponds to SARiac2 from wt plants and lower panel (b) to the corresponding HPLC fraction from the *eds1-2* mutant. *EDS1*-dependent accumulation was observed for mass 1 (9-oxo nonanoic acid; ONA) and 2 (azelaic acid; AzA). (B) SAR bio assay of SARiac 2. Col-0 plants were locally treated with 10 mM MgCl<sub>2</sub> (MOCK), *Pst/AvrRpm1* (*AvrRpm1*), chemical-treated water (chem. water), 0.2% DMSO, or with SARiac 2 from wt plants or the corresponding HPLC fraction from the *eds1-2* mutant. Three days later, systemic leaves were infected with *Pst* and the resulting *Pst* titers are shown at four dpi. Asterisks above bars indicate statistically significant differences to the MOCK or 0.2% DMSO controls (\*  $P < 0.05$ , Student's *t* test).

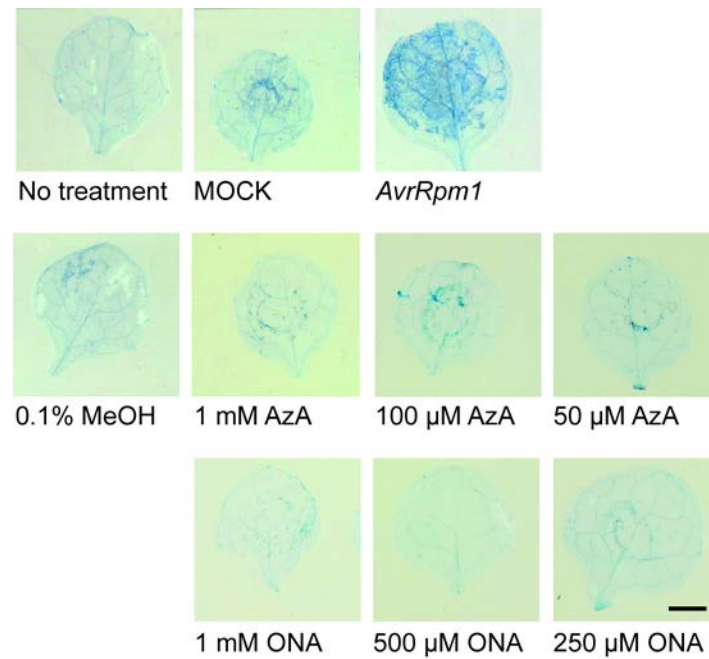

**Supplemental Figure S4** Trypan blue staining of ONA- and AzA-treated leaves. Leaves of Col-0 plants were not treated or syringe-infiltrated as indicated below the micrographs with 10 mM  $\text{MgCl}_2$  (MOCK), 0.1% Methanol (MeOH), or *Pst/AvrRpm1* (*AvrRpm1*) as controls or with 1 mM, 100  $\mu$ M, or 50  $\mu$ M of Azelaic acid (AzA) or 1 mM, 500  $\mu$ M, or 250  $\mu$ M of 9-oxo nonanoic acid (ONA). Three days post-infiltration, the leaves were analyzed by lacto-phenol Trypan blue staining. Representative micrographs are shown from 10 leaves of 5 different Col-0 plants that were analyzed per treatment. Bar = 2 mm.

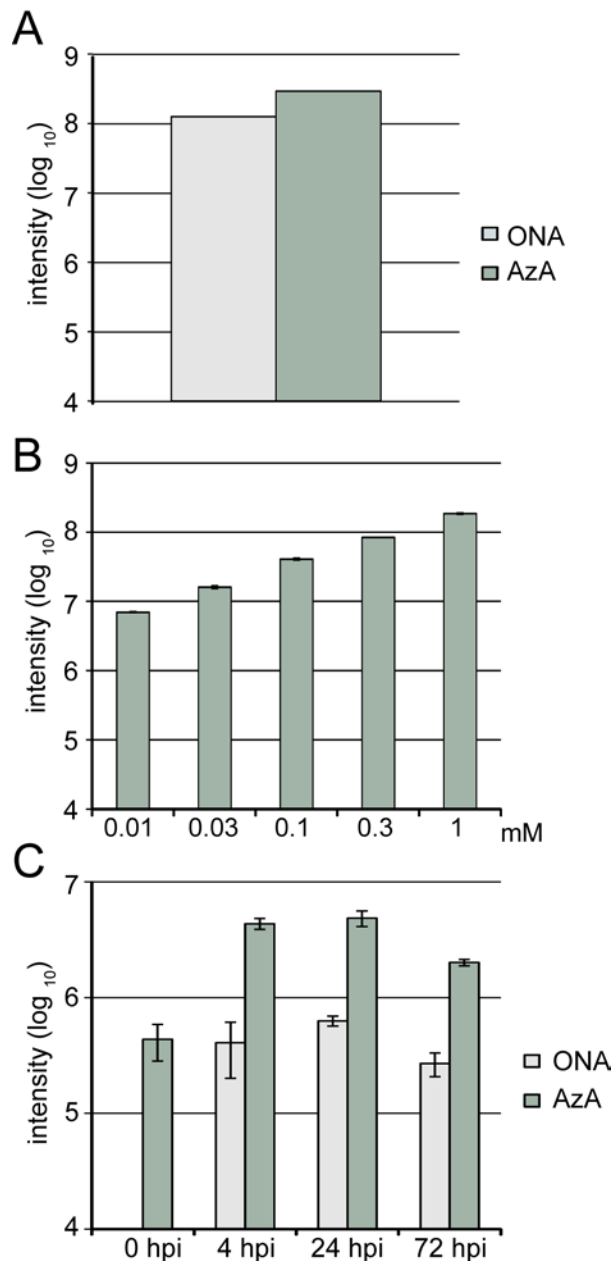

**Supplemental Figure S5** LC-MS of ONA after storage at  $-80^{\circ}\text{C}$  and after infiltration into plants. (A) MS signal intensities of ONA (light grey bars) and AzA (dark grey bars) in an 8 mM stock solution that had been kept at  $-80^{\circ}\text{C}$  for ~three months. By extrapolation of an AzA standard curve (shown in B), the 8 mM stock contained ~1.4 mM of AzA. Thus, a signal intensity ratio of ~1:3 (ONA:AzA in A) corresponds to a molar ratio of ONA:AzA of ~6:1. (C) Integrity of exogenous ONA in *Arabidopsis* leaves. Col-0 leaves were untreated (0 hpi) or syringe-infiltrated with 250  $\mu\text{M}$  ONA. The treated leaves were harvested at 4, 24, and 72 hpi. The samples were ground in liquid  $\text{N}_2$ , extracted with MeOH, and dried by evaporation to concentrate the metabolites that were dissolved in MeOH for LC-MS analysis. In contrast to AzA, ONA could not be detected in the samples from untreated Col-0 leaves. At 4 hpi the signal intensity ratio between ONA and AzA had shifted to ~1:10 (from 1:3 in the infiltrated solution diluted from the stock analyzed in A). This signal intensity ratio did not appear to change until 72 hpi. The data depicted in (C) includes measurements from two independent experiments that were repeated two times with comparable results using two different concentrations from the stock analyzed in (A).

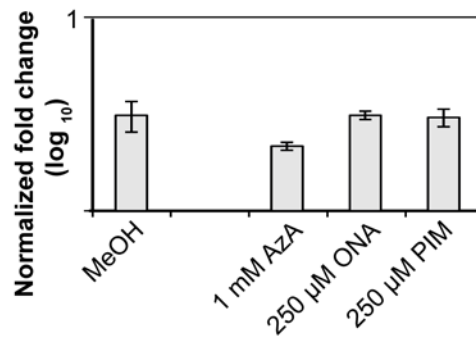

**Supplemental Figure S6** Systemic *AZI1* expression in response to local ONA and AzA applications. Col-0 plants were locally treated with 0.1% methanol (MeOH), 1 mM AzA, 250 μM ONA, or 250 μM PIM. Three days later, RNA was isolated from systemic untreated leaves of the treated plants and analysed by qRT-PCR with primers specific for *AZI1* (Jung *et al.*, 2009). *AZI1* transcript accumulation was normalized to that of *TUBULIN*. The normalized fold change is shown relative to *AZI1* transcript accumulation in untreated plants. This experiment was repeated two times with similar results. The data shown here originate from the same samples that were used in Fig. 6A.
